# Supplementary material for: CXXC-finger protein 1 associates with FOXP3 to stabilize homeostasis and suppressive functions of regulatory T cells
Source: eLife. 2025 Apr 4;13:RP103417. doi: 10.7554/eLife.103417 (PMC11970909; doi:10.7554/eLife.103417)
Supplement: Figure 3—figure supplement 1—source data 3. [file elife-103417-fig3-figsupp1-data3.xlsx]

## Sheet: S-Figure 3A
Figure S3. Disrupted immune homeostasis in Foxp3creCxxc1fl/fl mice.
Fig.S3.A. Analysis of Cxxc1 mRNA (left) and protein (right) expression in CD4+YFP+ Treg cells from Foxp3cre and Foxp3creCxxc1fl/fl mice.
Mouse ID	Foxp3cre	Foxp3creCxxc1fl/fl mice
1	0.89398	0.014994
2	1.32055	0.025451
3	0.785467	0.013919
4		0.0315545

## Sheet: S-Figure 3B
Figure S3. Disrupted immune homeostasis in Foxp3creCxxc1fl/fl mice.
Fig.S3.B. Quantification of serum IgG and IgE from Foxp3cre and Foxp3creCxxc1fl/fl mice(n=4).
IgG
Mouse ID	Foxp3cre	Foxp3creCxxc1fl/fl mice
1	1.17505	1.65965
2	0.9623	1.61335
3	0.98855	1.5149
4	1.1294	1.4414
IgE
Mouse ID	Foxp3cre	Foxp3creCxxc1fl/fl mice
1	0.41035	0.59975
2	0.45935	0.5442
3	0.5536	0.4783
4	0.44	0.5001

## Sheet: S-Figure 3C
Figure S3. Disrupted immune homeostasis in Foxp3creCxxc1fl/fl mice.
Fig.S3.C. Quantification of the frequencies and absolute numbers of CD4⁺ Foxp3⁺ Treg cells in the small intestinal lamina propria (LPL), liver, and lung of Foxp3cre and Foxp3creCxxc1fl/fl mice (n=6).
%	Foxp3cre						Foxp3creCxxc1fl/fl mice
Mouse ID	1	2	3	4	5	6	1	2	3	4	5	6
Colon	5.96	3.22	4.57	5.71	3.56	10.5	2.72	1.48	2.68	1.32	1.91	1.79
Liver	19	17.7	22	23.9	19.1	14	1.24	1.05	0.84	1.48	1.74	1.14
Lung	8.36	9.17	12.5	10.9	12.1	13.2	1.21	1.82	2.11	2.86	1.82	1.28
Cell number	Foxp3cre						Foxp3creCxxc1fl/fl mice
Mouse ID	1	2	3	4	5	6	1	2	3	4	5	6
Colon	6.468	3.864	1.6926	7.954	4.4	4.995	1.5	1.0336	0.8925	1.12	1.584	1.736
Liver	27.14	9.6	15.05	11.76	17.86	18.36	3.96	3.528	1.36	5.28	7.56	4.992
Lung	2.068	3.88	2.744	3.348	4.444	3.096	0.6478	0.6956	0.3696	0.979	1.62	0.5538

## Sheet: S-Figure 3D
Figure S3. Disrupted immune homeostasis in Foxp3creCxxc1fl/fl mice.
Fig.S3.D. Absolute cell counts of Total T, CD4+, and CD8+ T-cell subsets are shown (n=6).
cell number	Foxp3cre						Foxp3creCxxc1fl/fl mice
Mouse ID	1	2	3	4	5	6	1	2	3	4	5	6
Total T	1.90125	2.59259	1.9942	2.1762	1.9012	1.89926	13.693	10.56	15.5074	13.008	15.093	12.2202
CD4+	1.2519	1.77723	1.2213	1.4012	1.19795	1.28249	3.67965	5.36	7.02768	6.48	7.6635	3.81936
CD8+	0.61425	0.77714	0.7375	0.744	0.6693	0.592295	6.3112	4.84	7.78272	6.144	6.9615	5.913

## Sheet: S-Figure 3E
Figure S3. Disrupted immune homeostasis in Foxp3creCxxc1fl/fl mice.
Fig.S3.E. Percentages of IL-17A+ (n=6) CD4+ T cells in ly-mphnodes from Foxp3cre and Foxp3creCxxc1fl/fl mice.
CD4+YFP_IL-17A(%)
Mouse ID	Foxp3cre	Foxp3creCxxc1fl/fl mice
1	0.26	0.88
2	0.21	1.07
3	0.94	1.45
4	0.81	1.7
5	0.26	0.72
6	0.39	1.86

## Sheet: S-Figure 3F
Figure S3. Disrupted immune homeostasis in Foxp3creCxxc1fl/fl mice.
Fig.S3.F. Percentages of IL-4+ (n=6) CD4+ T cells in ly-mphnodes from Foxp3cre and Foxp3creCxxc1fl/fl mice.
CD8+YFP_IL-4(%)
Mouse ID	Foxp3cre	Foxp3creCxxc1fl/fl mice
1	2.27	6.69
2	2.34	7.07
3	1.36	3.85
4	0.8	9.96
5	0.75	4.23
6	1.17	10.8
