# Supplementary material for: CXXC-finger protein 1 associates with FOXP3 to stabilize homeostasis and suppressive functions of regulatory T cells
Source: eLife. 2025 Apr 4;13:RP103417. doi: 10.7554/eLife.103417 (PMC11970909; doi:10.7554/eLife.103417)
Supplement: Figure 3—source data 1. [file elife-103417-fig3-data1.xlsx]

## Sheet: Figure 3A
Fig.3. Foxp3creCxxc1fl/fl mice spontaneously develop a fatal early-onset inflammatory disorder.
Fig.3.A. Survival curves of Foxp3cre (black line) and Foxp3creCxxc1fl/fl (red line) mice (n = 20).
Mouse ID	Survival Time (days)	Foxp3cre	Foxp3creCxxc1fl/fl mice
1	24	0	1
2	43	0	1
3	31	0	1
4	22	0	1
5	23	0	1
6	23	0	1
7	29	0	1
8	25	0	1
9	21	0	1
10	19	0	1
11	20	0	1
12	21	0	1
13	27	0	1
14	27	0	1
15	28	0	1
16	22	0	1
17	22	0	1
18	31	0	1
19	23	0	1
20	27	0	1
				Survival status: 0 = Alive, 1 = Deceased

## Sheet: Figure 3B
Fig.3. Foxp3creCxxc1fl/fl mice spontaneously develop a fatal early-onset inflammatory disorder.
Fig.3.B. Gross body weight of Foxp3cre and Foxp3creCxxc1fl/fl mice (n = 6).
Mouse ID	Foxp3cre	Foxp3creCxxc1fl/fl mice
1	10.32	5.2
2	10	6.06
3	9.36	5.34
4	8.81	6.06
5	8.78	5.72
6	8.5	6.78

## Sheet: Figure 3E
Fig.3. Foxp3creCxxc1fl/fl mice spontaneously develop a fatal early-onset inflammatory disorder.
Fig.3.E. ELISA quantification of anti-dsDNA IgG in the serum of Foxp3cre and Foxp3creCxxc1fl/fl mice (n = 4).
Mouse ID	Foxp3cre	Foxp3creCxxc1fl/fl mice
1	0.161	0.474
2	0.1905	0.5315
3	0.1445	0.391
4	0.1315	0.313

## Sheet: Figure 3H
Fig.3. Foxp3creCxxc1fl/fl mice spontaneously develop a fatal early-onset inflammatory disorder.
Fig.3.H. Frequency of CD44lowCD62Lhi and CD44hiCD62Llow population in CD4+ YFP- or CD8+ T cells (n = 6).
CD4
	%	Foxp3cre						Foxp3creCxxc1fl/fl mice
	Mouse ID	1	2	3	4	5	6	1	2	3	4	5	6
	CD62LhiCD44low	88.9	90.7	88.5	88.4	89.2	90.3	35.9	36	54.5	41.5	53.1	57
	CD62LlowCD44hi	3.17	2.13	3.59	2.36	1.6	2.61	42	43.2	26	36.3	26	19.2
CD8
	%	Foxp3cre						Foxp3creCxxc1fl/fl mice
	Mouse ID	1	2	3	4	5	6	1	2	3	4	5	6
	CD62LhiCD44low	61.5	63.3	68.9	59.4	53.2	65.1	43.9	43.5	43	43.8	52.8	62
	CD62LlowCD44hi	1.39	0.99	1.1	1.29	1	1.26	33.8	31.8	32.4	31.3	16.6	9.47

## Sheet: Figure 3I
Fig.3. Foxp3creCxxc1fl/fl mice spontaneously develop a fatal early-onset inflammatory disorder.
Fig.3.I. Percentages of IFN-γ+CD4+ YFP- or IFN-γ+CD8+ T cells in the lymph nodes of Foxp3cre and Foxp3creCxxc1fl/fl mice (n = 6).
CD4+YFP_IFNg(%)
Mouse ID	Foxp3cre	Foxp3creCxxc1fl/fl mice
1	0.99	19.8
2	0.92	8.79
3	1.73	20.9
4	2.01	23.4
5	1.9	17.9
6	1.75	20.8
CD8+YFP_IFNg(%)
Mouse ID	Foxp3cre	Foxp3creCxxc1fl/fl mice
1	38.6	66.7
2	39.5	67.2
3	46	74
4	48.7	69.3
5	46.7	57.1
6	40.8	52.5
