# Supplementary material for: CXXC-finger protein 1 associates with FOXP3 to stabilize homeostasis and suppressive functions of regulatory T cells
Source: eLife. 2025 Apr 4;13:RP103417. doi: 10.7554/eLife.103417 (PMC11970909; doi:10.7554/eLife.103417)
Supplement: Figure 4—figure supplement 1—source data 1. [file elife-103417-fig4-figsupp1-data1.xlsx]

## Sheet: S-Figure 4A
Fig.S4. The number of Treg cells deficient in CXXC1 did not decrease.
Fig.S4.A. On the right, the proportion and number of Treg cells are shown (n=6).
%
Mouse ID	Foxp3cre	Foxp3creCxxc1fl/fl mice
1	10.7	18.1
2	9.95	19.4
3	8.31	23.1
4	12	22.5
5	10.6	21.9
6	12.9	18.2
cell number
Mouse ID	Foxp3cre	Foxp3creCxxc1fl/fl mice
1	8.775	116.644
2	8.8543	124
3	7.729	118.483
4	8.804	143.04
5	8.2935	129.285
6	7.78305	60.444

## Sheet: S-Figure 4B
Fig.S4. The number of Treg cells deficient in CXXC1 did not decrease.
Fig.S4.B. Representative figure showing FOXP3 protein expression in CD4+ T cells from the lymph nodes (n=6).
Mouse ID	Foxp3cre	Foxp3creCxxc1fl/fl mice
1	1538	1706
2	1447	1441
3	1604	1437
4	1347	1536
5	1452	1666
6	1419	1372

## Sheet: S-Figure 4C
Fig.S4. The number of Treg cells deficient in CXXC1 did not decrease.
Fig.S4.C.On the right, the percentage of proliferated responding T cells is presented (n=3).
	Foxp3cre			Foxp3creCxxc1fl/fl mice
	rep1	rep2	rep3	rep1	rep2	rep3
1：2	24.4	13.5	15.5	27.8	21.2	25.7
1：4	31.6	29.3	24.9	35.4	30.2	42
1：8	48.7	60.5	44.4	52.5	55.2	55.8

## Sheet: S-Figure 4D
Fig.S4. The number of Treg cells deficient in CXXC1 did not decrease.
Fig.S4.D.Expression of Treg signature molecules in Foxp3cre and Foxp3creCxxc1fl/fl mice (n=6).
CTLA4
Mouse ID	Foxp3cre	Foxp3creCxxc1fl/fl mice
1	89.2	113
2	69.5	113
3	84.4	151
4	79.7	113
5	66	89.2
6	94.8	114
GITR
Mouse ID	Foxp3cre	Foxp3creCxxc1fl/fl mice
1	2572	3056
2	2561	3415
3	2739	3197
4	2605	3118
5	3606	2912
6	2855	3087
