# Supplementary material for: CXXC-finger protein 1 associates with FOXP3 to stabilize homeostasis and suppressive functions of regulatory T cells
Source: eLife. 2025 Apr 4;13:RP103417. doi: 10.7554/eLife.103417 (PMC11970909; doi:10.7554/eLife.103417)
Supplement: Figure 4—source data 1. [file elife-103417-fig4-data1.xlsx]

## Sheet: Figure 4A
Fig.4. CXXC1 is essential for Treg cells to suppress T cell-mediated EAE and colitis.
score	2D2					2D2+Foxp3cre					2D2+Foxp3creCxxc1fl/fl mice
Time（day）	1	2	3	4	5	1	2	3	4	5	1	2	3	4	5
1	0	0	0	0	0	0	0	0	0	0	0	0	0	0	0
2	0	0	0	0	0	0	0	0	0	0	0	0	0	0	0
3	0	0	0	0	0	0	0	0	0	0	0	0	0	0	0
4	0	0	0	0	0	0	0	0	0	0	0	0	0	0	0
6	0	0	0	0	0	0	0	0	0	0	0	0	0	0	0
7	0	0	0	0	0	0	0	0	0	0	0	0	0	0	0
8	1	0	1.5	1	0	0	0	0	0	0	0	0	0	0	0
9	2	0	2	1	1	0.5	1	0.5	0.5	0	1	1	0	1	1
10	2	1	3	2	2	1	1	1	1	1	2	2	1	2	1
11	2	2	3	3	4	2	1.5	1.5	1.5	2	2	4	2	3	3
12	3	3	3.5	4	5	2	2	1.5	2.5	2	4	4	3	4	4
13	4	4	4	4	5	2	2.5	2	3	3	4	4	4	5	5

## Sheet: Figure 4D
Fig.4. CXXC1 is essential for Treg cells to suppress T cell-mediated EAE and colitis.
Fig.4.D. Representative flow cytometry plots and quantification of the the percentages of IFNγ+ or IL-17A+ CD4+Vβ11+ T cells (n=5).
	2D2					2D2+Foxp3cre					2D2+Foxp3creCxxc1fl/fl mice
	1	2	3	4	5	1	2	3	4	5	1	2	3	4	5
IL-17A+IFNγ-	16.6	13.4	10.4	11.4	11.3	2.85	1.98	3.16	3.68	4.87	13.8	7.01	6.98	5.97	13.5
IL-17A+IFNγ+	14.3	13.6	10.7	16	6.81	5.33	3.36	6.13	7.03	1.27	10	11.5	5.29	9.86	8.86

## Sheet: Figure 4E
Fig.4. CXXC1 is essential for Treg cells to suppress T cell-mediated EAE and colitis.
Fig.4.E. Statistical analysis of the percentage CD4+ FOXP3+ Treg cell in CNS tissues 14 days after EAE induction.
Mice ID	2D2	2D2+Foxp3cre	2D2+Foxp3creCxxc1fl/fl mice
1	0	1.02	0.23
2	0	1.35	0.3
3	0	1	0.11
4	0	1.39	0.086
5	0	0.36	0.14

## Sheet: Figure 4F
Fig.4. CXXC1 is essential for Treg cells to suppress T cell-mediated EAE and colitis.
Changes in body weight of Rag1−/− mice after colitis induction(n=6).
	Tn					Tn+Treg(Foxp3cre)						Tn+Treg(Foxp3creCxxc1fl/fl mice)
Week after transfer	1	2	3	4	5	6	1	2	3	4	5	6	1	2	3	4	5	6
0	100	100	100	100	100	100	100	100	100	100	100	100	100	100	100	100	100	100
1	97.8789	97.3217	99.8107	98.4798	99.8107	98.9773	101.581	102.824	102.891	98.0851	102.45	101.249	99.6589	100.123	99.7572	102.35	102.246	100.909
2	92.2518	93.1403	94.6475	90.924	92.6475	91.7045	102.429	105.563	107.696	101.277	103.883	101.707	97.9531	96.9635	98.705	95.6427	96.8648	98.7566
3	86.36	89.8686	87.4582	88.4086	90.4582	87.7273	103.045	106.846	106.984	104.128	104.623	102.873	89.0832	92.4908	89.8017	94.3885	96.5372	96.7001
4	85.2704	85.2904	85.2361	88.5036	84.8164	86.0795	105.281	107.231	110.009	103.404	105.085	102.498	87.4806	90.0287	87.9806	91.4149	94.8526	93.4481
5	82.042	83.51	84.8164	85.4157	84.8629	87.8977	105.513	106.504	110.276	103.787	106.334	107.369	86.6525	88.4694	86.4832	90.5995	93.2616	93.1612
6	81.9209	82.2806	83.8629	82.6603	83.9833	85.9091	105.59	106.376	112.367	103.66	107.258	106.162	85.5586	85.6959	85.1882	87.0983	92.8404	87.0655

## Sheet: Figure 4H
Fig.4. CXXC1 is essential for Treg cells to suppress T cell-mediated EAE and colitis.
Fig.4.H. Statistical analysis of the percentage CD4+ FOXP3+ Treg cell in the spleen, mesenteric lymph nodes, and colon 6 weeks after colitis induction.
	Tn+Treg(Foxp3cre)					Tn+Treg(Foxp3creCxxc1fl/fl mice)
Mice ID	1	2	3	4	5	1	2	3	4	5
Spleen	80.2	70.8	63.7	86.4	58.3	0.82	0.74	0	1.48	1.3
mLN	66.9	58.6	67.5	79.4	54.2	0.57	0.8	2.39	0.62	0
Colon	80	77.4	82	87.9	83.5	0.069	0.38	0.36	0.27	0
