# Supplementary material for: CXXC-finger protein 1 associates with FOXP3 to stabilize homeostasis and suppressive functions of regulatory T cells
Source: eLife. 2025 Apr 4;13:RP103417. doi: 10.7554/eLife.103417 (PMC11970909; doi:10.7554/eLife.103417)
Supplement: Figure 5—figure supplement 1—source data 1. [file elife-103417-fig5-figsupp1-data1.xlsx]

## Sheet: S-Figure 5E
Fig.S 5. Single-cell transcriptomics reveals distinct Treg cell populations.
Fig.S5.E. Representative flow plots and quantified expression of KLRG1, CD62L, CD73, and PD-1 in CD4+YFP+ Treg cells from Foxp3cre and Foxp3creCxxc1fl/fl mice (n=6 KLRG1, n=6 CD62L, n=6 CD73, n=8 PD-1).
KLRG1
Mouse ID	Foxp3cre	Foxp3creCxxc1fl/fl mice
1	545	265
2	597	200
3	719	259
4	738	148
5	647	133
6	684	264
CD62L
Mouse ID	Foxp3cre	Foxp3creCxxc1fl/fl mice
1	6617	3466
2	6035	3004
3	6710	3143
4	7052	2935
5	7684	3198
6	8496	3385
CD73
Mouse ID	Foxp3cre	Foxp3creCxxc1fl/fl mice
1	1898	985
2	1830	1202
3	1833	831
4	1772	1251
5	2588	910
6	2102	832
PD-1
Mouse ID	Foxp3cre	Foxp3creCxxc1fl/fl mice
1	926	465
2	929	858
3	891	430
4	737	657
5	731	664
6	914	374.3
7	936.7	334.4
8	921.5	435.1
9	832.2
10	771.4
