# Supplementary material for: CXXC-finger protein 1 associates with FOXP3 to stabilize homeostasis and suppressive functions of regulatory T cells
Source: eLife. 2025 Apr 4;13:RP103417. doi: 10.7554/eLife.103417 (PMC11970909; doi:10.7554/eLife.103417)
Supplement: Figure 5—source data 1. [file elife-103417-fig5-data1.xlsx]

## Sheet: Figure 5G
Fig. 5. Single-cell transcriptomics reveals distinct Treg cell populations.
Fig.5.G. Representative flow cytometry plots and quantification of expression of CD25, CD69, ICOS, T-bet, in CD4+YFP+ Treg cells from Foxp3cre and Foxp3creCxxc1fl/fl mice (n=5 CD25, n=10 CD69, n=5 ICOS, n=6 T-bet).
CD25
Mouse ID	Foxp3cre	Foxp3creCxxc1fl/fl mice
1	3704	24021
2	3120	12963
3	5270	18045
4	4506	12938
5	5199	12769
CD69
Mouse ID	Foxp3cre	Foxp3creCxxc1fl/fl mice
1	94.9	656
2	130	608
3	95.2	410
4	87.5	489
5	102	274
6	132	329
7	123	646
8	117	385
9	97	399
10	98.3	179
ICOS
Mouse ID	Foxp3cre	Foxp3creCxxc1fl/fl mice
1	3143	9280
2	3066	6702
3	1641	3288
4	2004	4116
5	3132.5	7976.5
6	2446.5	8386
T-bet
Mouse ID	Foxp3cre	Foxp3creCxxc1fl/fl mice
1	435	609
2	435	552
3	527.5	845
4	422.5	600
5	229.5	657.5
6	317.5	610

## Sheet: Figure 5H
Fig. 5. Single-cell transcriptomics reveals distinct Treg cell populations.
Fig.5.H. Representative flow cytometry plots and quantification of expression of IFN-γ in CD4+YFP+ Treg cells from Foxp3cre and Foxp3creCxxc1fl/fl mice ( n=5 ).
Mouse ID	Foxp3cre	Foxp3creCxxc1fl/fl mice
1	1.79	10.5
2	1.21	9.42
3	1.41	6.61
4	1.68	9.94
5	1.62	6.78

## Sheet: Figure 5I
Fig. 5. Single-cell transcriptomics reveals distinct Treg cell populations.
Fig.5.I. Ki-67 expression (left) and frequency (right) in CD4+FOXP3+ Treg cells from Foxp3cre a-nd Foxp3creCxxc1fl/fl mice (n=6).
Mouse ID	Foxp3cre	Foxp3creCxxc1fl/fl mice
1	38.7	14.5
2	40.4	10.1
3	48.5	10.7
4	40.2	7.09
5	50.3	9.36
6	43.9	10.6
