# Supplementary material for: CXXC-finger protein 1 associates with FOXP3 to stabilize homeostasis and suppressive functions of regulatory T cells
Source: eLife. 2025 Apr 4;13:RP103417. doi: 10.7554/eLife.103417 (PMC11970909; doi:10.7554/eLife.103417)
Supplement: Figure 6—figure supplement 1—source data 1. [file elife-103417-fig6-figsupp1-data1.xlsx]

## Sheet: S-Figure 6A
Fig.S6. Cxxc1 deficiency impairs Treg Cell suppressive function and aggravates EAE severity.
Fig.S6.A.Mean clinical scores for EAE in Rag1-/-recipients of 2D2 CD4+ T cells, either alone or in combination with Foxp3Cre/+ Cxxc1fl/+ or Foxp3Cre/+ Cxxc1fl/fl female mice after immunization with MOG35–55, complete Freund’s adjuvant (CFA), and pertussis toxin (n=6).
	2D2						2D2+Foxp3Cre/+ Cxxc1fl/+						2D2 +Foxp3Cre/+ Cxxc1fl/fl
Time(days)	1	2	3	4	5	6	1	2	3	4	5	6	1	2	3	4	5	6
1	0	0	0	0	0	0	0	0	0	0	0	0	0	0	0	0	0	0
2	0	0	0	0	0	0	0	0	0	0	0	0	0	0	0	0	0	0
3	0	0	0	0	0	0	0	0	0	0	0	0	0	0	0	0	0	0
4	0	0	0	0	0	0	0	0	0	0	0	0	0	0	0	0	0	0
5	0	0	0	0	0	0	0	0	0	0	0	0	0	0	0	0	0	0
6	0	0	0	0	0	0	0	0	0	0	0	0	0	0	0	0	0	0
7	0	0	0	0	0	0	0	0	0	0	0	0	0	0	0	0	0	0
8	0	0	0	0	0	0	0	0	0	0	0	0	0	0	0	0	0	0
9	1	1	1	1	0	1	0	0	0	0	0	0	1	1	1	1	1	1
10	2	2	2	2	2	3	1	1	1	1	1	1	2	2	2	2	2	1
11	3	2	2	3	2	3	2	1	2	2	1	1	2	3	2	2	2	2
12	3	3	3	3	3	4	2	2	2	3	3	2	3	3	3	3	3	3
13	4	4	4	5	4	4	2	2	3	3	3	3	4	4	5	4	4	4
14	5	5	5	5	4	5	3	3	3	3	3	4	5	4	5	5	5	4

## Sheet: S-Figure 6D
Fig.S6. Cxxc1 deficiency impairs Treg Cell suppressive function and aggravates EAE severity.
Fig.S6.D. Representative flow cytometry plots and quantification of the the percentages of IFNγ+ or IL-17A+ CD4+Vβ11+ T cells.
	2D2			2D2+Foxp3Cre/+ Cxxc1fl/+					2D2 +Foxp3Cre/+ Cxxc1fl/fl
IL-17A+IFNg+	11	13	13.2	2.5	2.61	5.17	2.03	2.18	7.35	4.88	5.57	4.69	8.47
IL-17A+IFNg-	15.8	11.2	9.24	7.01	6.39	5.96	2.24	2.68	8.1	8.54	10.9	5.17	9.77

## Sheet: S-Figure 6E
Fig.S6. Cxxc1 deficiency impairs Treg Cell suppressive function and aggravates EAE severity.
Fig.S6.E. Statistical analysis of the percentage CD4+ FOXP3+ Treg cell in CNS tissues 14 days after EAE induction.
2D2	2D2+Foxp3Cre/+ Cxxc1fl/+	2D2 +Foxp3Cre/+ Cxxc1fl/fl
1.49	5.5	0.86
2.57	10.8	2.43
0.29	8.51	0.38
	10.5	0.92
	9.91	1.59
