# Supplementary material for: CXXC-finger protein 1 associates with FOXP3 to stabilize homeostasis and suppressive functions of regulatory T cells
Source: eLife. 2025 Apr 4;13:RP103417. doi: 10.7554/eLife.103417 (PMC11970909; doi:10.7554/eLife.103417)
Supplement: Figure 6—source data 1. [file elife-103417-fig6-data1.xlsx]

## Sheet: Figure 6B
Fig. 6. Cxxc1-deficient Treg cells exhibit functional impairment and disrupted homeostasis in steady-state conditions.
Fig.6.B.Frequency and absolute numbers of YFP⁺ cells within the total Treg population (n=5).
Mouse ID	Foxp3cre/+Cxxc1fl/+	Foxp3cre/+Cxxc1fl/fl
1	44.4646	13.9845
2	25.9924	9.61357
3	21.0159	17.1454
4	31.8064	8.46512
5	40.5797	8.64198
YFP+ cell number
Mouse ID	Foxp3cre/+Cxxc1fl/+	Foxp3cre/+Cxxc1fl/fl
1	1.76	0.513
2	1.2672	0.338
3	1.035	0.99
4	2.04	0.432
5	1.92	0.5148

## Sheet: Figure 6C
Fig. 6. Cxxc1-deficient Treg cells exhibit functional impairment and disrupted homeostasis in steady-state conditions.
Fig.6.C.Flow cytometry analysis of Ki-67expression in YFP- and YFP+ cells
Mouse ID	YFP-	YFP+
1	14.8	4.41
2	15.4	5.77
3	12.3	4.23
4	11.8	4.02

## Sheet: Figure 6D
Fig. 6. Cxxc1-deficient Treg cells exhibit functional impairment and disrupted homeostasis in steady-state conditions.
Fig.6.D.Representative flow cytometry plots and quantification of ICOS, CD25, CTLA4, and GITR expression in YFP- and YFP+ cells within CD4+FOXP3+ Treg cells from het-KO female mice (n=5).
ICOS
Mouse ID	YFP-	YFP+
1	263	124
2	336	73.8
3	372	184
4	299	101
5	315	156
CD25
Mouse ID	YFP-	YFP+
1	4544	3414
2	3761	2931
3	4056	3131
4	4245	3201
5	4346	3245
CTLA4
Mouse ID	YFP-	YFP+
1	3987	1662
2	3742	2066
3	3836	2174
4	4597	2396
5	4584	3330
GITR
Mouse ID	YFP-	YFP+
1	22095	10883
2	23574	13152
3	23172	11446
4	26090	14811
5	28058	17714

## Sheet: Figure 6E
Fig. 6. Cxxc1-deficient Treg cells exhibit functional impairment and disrupted homeostasis in steady-state conditions.
Fig.6.E. Percentage of proliferated responding T cells (n=5).
	Foxp3Cre/+ Cxxc1fl/+					Foxp3Cre/+ Cxxc1fl/fl
	1	2	3	4	5	1	2	3	4	5
1:2	75.3	78.3	73.7	79.2	74.1	86.3	89.5	89.6	90.5	90.3
1:4	91.8	94.3	94.3	92.3	90.4	95.3	94	94.1	94.6	94.4
1:8	96.4	95.9	96.1	96.3	96.5	95.8	95.7	96	95.2	96.2
