# Supplementary figures and images for: CXXC-finger protein 1 associates with FOXP3 to stabilize homeostasis and suppressive functions of regulatory T cells
Source: eLife journal article supplement (doi:10.7554/elife.103417), 2024-11-21

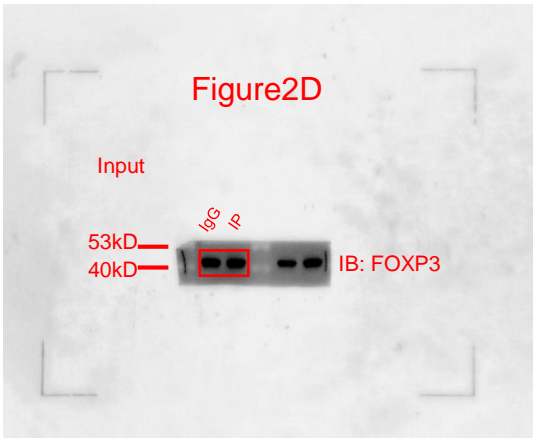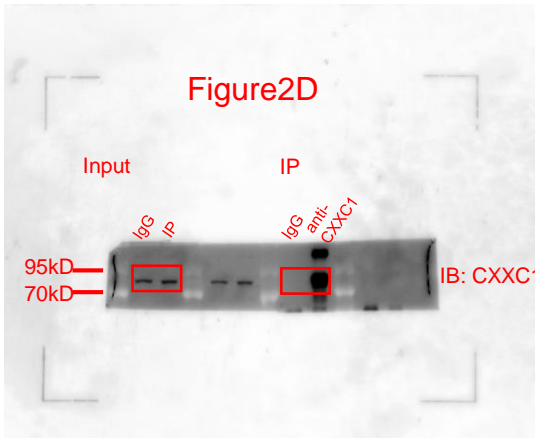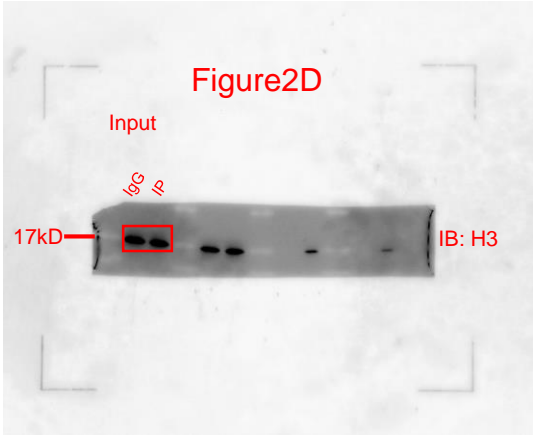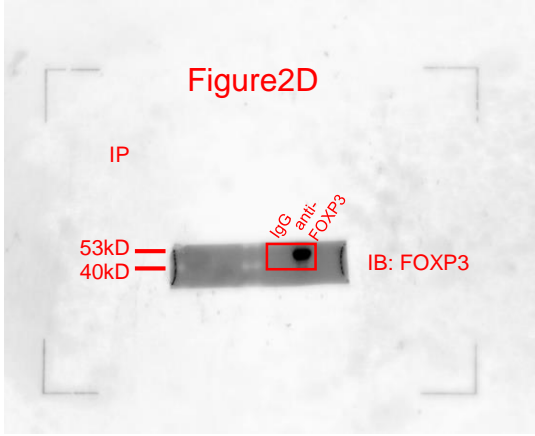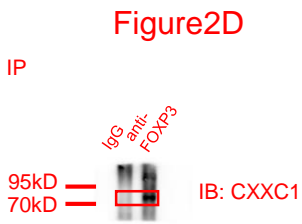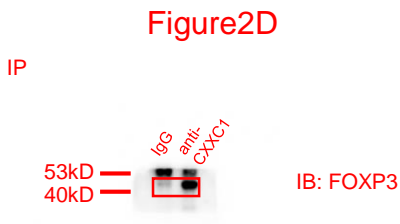

Supplement: fig2-data1 [file elife-103417-fig2-data1-v1.zip]

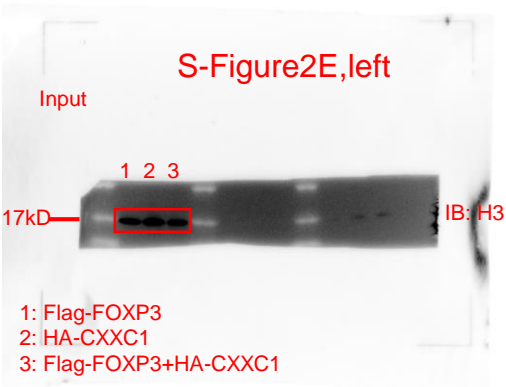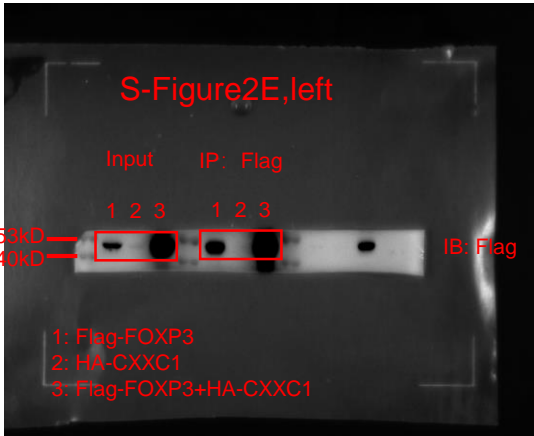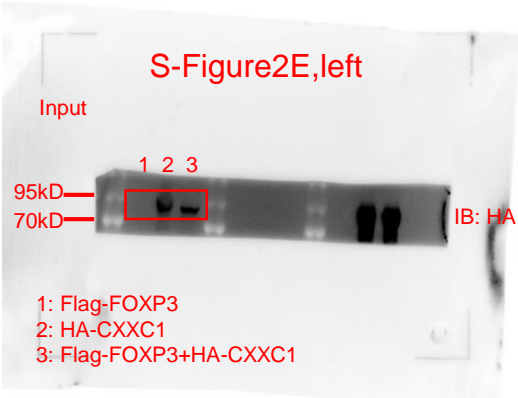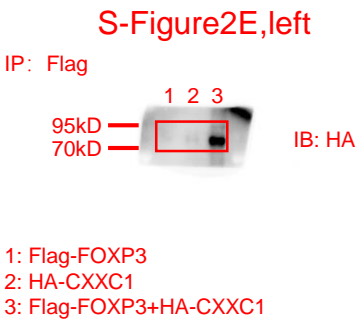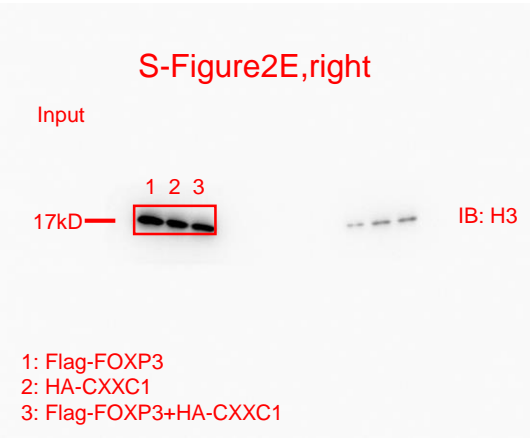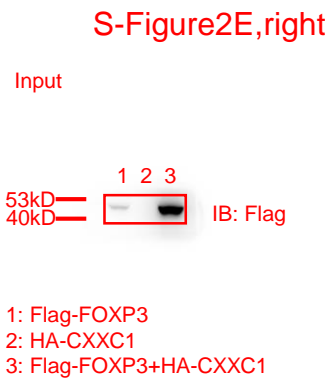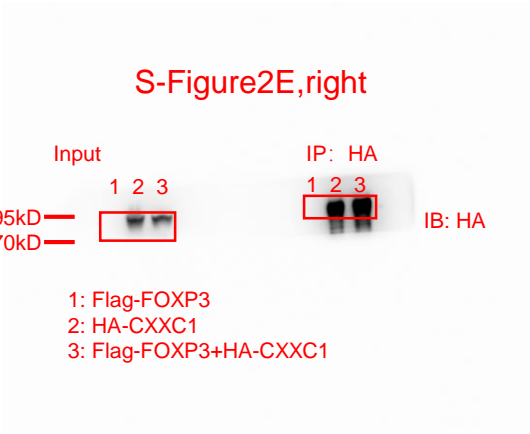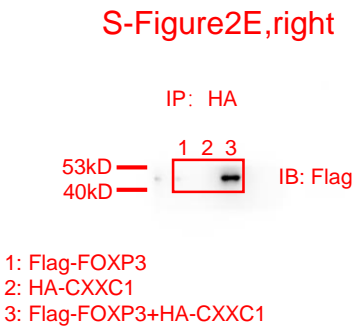

Supplement: fig2-figsupp1-data1 [file elife-103417-fig2-figsupp1-data1-v1.zip]

S-Figure3A

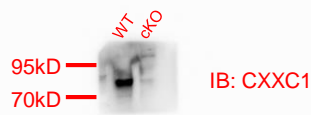

S-Figure3A

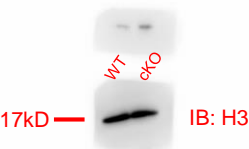

Supplement: fig3-figsupp1-data1 [file elife-103417-fig3-figsupp1-data1-v1.zip]
